# Supplementary material
Source: PubMed Central journal article supplement (PMC3593729)
Supplement: NIHMS427269-supplement-1.pdf [file NIHMS427269-supplement-1.pdf]

**Supplemental Table I. Sex-Specific Multivariable-Adjusted\* Regressions for ALT<40 U/L with Cardiometabolic Risk Factors**

|                              | <b>Women<br/>(N=1243)</b>                                  |                | <b>Men<br/>(N=1056)</b>                                    |                |
|------------------------------|------------------------------------------------------------|----------------|------------------------------------------------------------|----------------|
|                              | <b>MV adjusted beta<br/>coefficient or OR<br/>(95% CI)</b> | <b>p-value</b> | <b>MV adjusted beta<br/>coefficient or OR<br/>(95% CI)</b> | <b>p-value</b> |
| <b>Continuous Variables</b>  |                                                            |                |                                                            |                |
| Systolic Blood Pressure      |                                                            |                |                                                            |                |
| Base Model*                  | 1.08 (-0.02, 2.17)                                         | 0.06           | 2.39 (1.10, 3.69)                                          | 0.0003         |
| +VAT                         | 0.39 (-0.69, 1.47)                                         | 0.48           | 1.73 (0.42, 3.03)                                          | 0.01           |
| +HOMA-IR                     | 0.75 (-0.36, 1.86)                                         | 0.19           | 2.25 (0.96, 3.54)                                          | 0.0006         |
| +BMI                         | 0.29 (-0.80, 1.38)                                         | 0.60           | 1.76 (0.46, 3.06)                                          | 0.008          |
| Diastolic Blood Pressure     |                                                            |                |                                                            |                |
| Base Model*                  | 0.95 (0.32, 1.57)                                          | 0.003          | 2.38 (1.56, 3.19)                                          | <0.0001        |
| +VAT                         | 0.61 (-0.01, 1.23)                                         | 0.06           | 1.89 (1.08, 2.71)                                          | <0.0001        |
| +HOMA-IR                     | 0.81 (0.18, 1.45)                                          | 0.01           | 2.31 (1.50, 3.13)                                          | <0.0001        |
| +BMI                         | 0.55 (-0.07, 1.18)                                         | 0.08           | 1.89 (1.08, 2.70)                                          | <0.0001        |
| Fasting Plasma Glucose       |                                                            |                |                                                            |                |
| Base Model*                  | 1.76 (0.82, 2.70)                                          | 0.0002         | 1.72 (0.28, 3.16)                                          | 0.02           |
| +VAT                         | 0.79 (-0.10, 1.68)                                         | 0.08           | 0.93 (-0.52, 2.38)                                         | 0.21           |
| +BMI                         | 0.80 (-0.11, 1.71)                                         | 0.09           | 0.78 (-0.66, 2.22)                                         | 0.29           |
| Log Triglycerides            |                                                            |                |                                                            |                |
| Base Model*                  | 0.06 (0.03, 0.10)                                          | 0.0002         | 0.10 (0.05, 0.15)                                          | 0.0003         |
| +VAT                         | 0.02 (-0.01, 0.05)                                         | 0.12           | 0.05 (<0.01, 0.10)                                         | 0.08           |
| +HOMA-IR                     | 0.03 (<0.01, 0.07)                                         | 0.05           | 0.08 (0.03, 0.13)                                          | 0.003          |
| +BMI                         | 0.03 (-0.01, 0.06)                                         | 0.10           | 0.06 (0.01, 0.11)                                          | 0.02           |
| HDL Cholesterol              |                                                            |                |                                                            |                |
| Base Model*                  | -1.22 (-2.31, -0.14)                                       | 0.03           | -0.89 (-1.98, 0.20)                                        | 0.11           |
| +VAT                         | -0.15 (-1.18, 0.88)                                        | 0.77           | 0.29 (-0.76, 1.34)                                         | 0.59           |
| +HOMA-IR                     | -0.34 (-1.40, 0.73)                                        | 0.54           | -0.52 (-1.58, 0.53)                                        | 0.33           |
| +BMI                         | -0.15 (-1.20, 0.91)                                        | 0.79           | -0.01 (-1.08, 1.06)                                        | 0.99           |
| HOMA-IR                      |                                                            |                |                                                            |                |
| Base Model*                  | 0.42 (0.30, 0.54)                                          | <0.0001        | 0.28 (0.08, 0.48)                                          | 0.007          |
| +VAT                         | 0.25 (0.14, 0.35)                                          | <0.0001        | 0.04 (-0.16, 0.23)                                         | 0.70           |
| +BMI                         | 0.24 (0.13, 0.35)                                          | <0.0001        | 0.01 (-0.18, 0.19)                                         | 0.94           |
| <b>Dichotomous Variables</b> |                                                            |                |                                                            |                |

|                    |                   |         |                   |         |
|--------------------|-------------------|---------|-------------------|---------|
| Hypertension       |                   |         |                   |         |
| Base Model*        | 1.41 (1.18, 1.68) | 0.0001  | 1.26 (1.00, 1.58) | 0.047   |
| +VAT               | 1.25 (1.04, 1.50) | 0.02    | 1.10 (0.87, 1.39) | 0.44    |
| +HOMA-IR           | 1.20 (0.99, 1.45) | 0.06    | 1.22 (0.96, 1.53) | 0.10    |
| +BMI               | 1.23 (1.02, 1.48) | 0.03    | 1.11 (0.88, 1.41) | 0.37    |
| IFG                |                   |         |                   |         |
| Base Model*        | 1.44 (1.19, 1.74) | 0.0001  | 1.62 (1.31, 2.00) | <0.0001 |
| +VAT               | 1.27 (1.04, 1.55) | 0.02    | 1.46 (1.18, 1.81) | 0.0006  |
| +BMI               | 1.26 (1.03, 1.53) | 0.02    | 1.50 (1.21, 1.86) | 0.0002  |
| Diabetes           |                   |         |                   |         |
| Base Model*        | 1.57 (1.12, 2.21) | 0.01    | 1.12 (0.75, 1.67) | 0.58    |
| +VAT               | 1.37 (0.96, 1.97) | 0.08    | 1.00 (0.66, 1.51) | 1.00    |
| +BMI               | 1.29 (0.90, 1.86) | 0.17    | 0.98 (0.65, 1.48) | 0.93    |
| Metabolic Syndrome |                   |         |                   |         |
| Base Model*        | 1.78 (1.49, 2.12) | <0.0001 | 1.65 (1.32, 2.06) | <0.0001 |
| +VAT               | 1.50 (1.22, 1.84) | <0.0001 | 1.26 (0.99, 1.61) | 0.06    |
| +HOMA-IR           | 1.36 (1.11, 1.66) | 0.003   | 1.42 (1.12, 1.81) | 0.004   |
| +BMI               | 1.47 (1.21, 1.80) | 0.0001  | 1.35 (1.05, 1.72) | 0.02    |
| Insulin resistance |                   |         |                   |         |
| Base Model*        | 1.78 (1.50, 2.11) | <0.0001 | 1.81 (1.42, 2.31) | <0.0001 |
| +VAT               | 1.52 (1.25, 1.85) | <0.0001 | 1.42 (1.09, 1.85) | 0.01    |
| +BMI               | 1.48 (1.21, 1.79) | 0.0002  | 1.49 (1.14, 1.96) | 0.004   |

Data presented include effect size (SE) expressed per 1 SD increase in log ALT for continuous data, and the odds of the condition per 1 SD increase in log ALT with 95% confidence intervals for dichotomous data.

\*Adjusted for age, current smoking, high alcohol intake, physical activity, and menopausal status (women only), hormone replacement therapy (women only); for blood pressure, FPG, HDL cholesterol, and log triglycerides, an additional covariate of treatment for HTN, diabetes, or lipid disorders, respectively, was included.

Abbreviations: VAT, visceral adipose tissue; HOMA-IR, homeostasis model of insulin resistance; BMI, body mass index; HDL, high-density lipoprotein; IFG, impaired fasting glucose.
